# Supplementary material
Source: PubMed Central journal article supplement (PMC2764754)
Supplement: 082068v2_1.pdf [file 082068v2_1.pdf]

**Appendix 1:** Frequency distribution of daily concentrations of air pollutants, temperature and relative humidity between Apr. 1, 1999, and Dec. 31, 2006, in Calgary, Alberta, stratified by season

| Variable                                                  | Season;* daily value,† median (IQR) |                    |                     |                     |                     |
|-----------------------------------------------------------|-------------------------------------|--------------------|---------------------|---------------------|---------------------|
|                                                           | Overall                             | Spring             | Summer              | Autumn              | Winter              |
| Ozone, ppb<br><i>n</i> = 2832                             | 34.3 (26.7 to 42.3)                 | 42 (30.7 to 53.3)  | 40.5 (28.2 to 52.8) | 28.7 (17.7 to 39.7) | 27.7 (15.4 to 40)   |
| Sulfur dioxide, ppb<br><i>n</i> = 2821                    | 2 (1 to 3)                          | 2 (1 to 3)         | 2 (1 to 3)          | 2 (0 to 4)          | 3 (1 to 5)          |
| Nitrogen dioxide, ppb<br><i>n</i> = 2832                  | 20.3 (15.3 to 27)                   | 19 (10.3 to 27.7)  | 15.3 (9.3 to 21.3)  | 21.4 (11.2 to 31.6) | 29.3 (19 to 39.6)   |
| Carbon monoxide, ppm<br><i>n</i> = 2832                   | 0.4 (0.4 to 0.6)                    | 0.4 (0.2 to 0.6)   | 0.4 (0.3 to 0.5)    | 0.5 (0.2 to 0.8)    | 0.6 (0.2 to 1.0)    |
| PM <sub>2.5†</sub> , µg/m <sup>3</sup><br><i>n</i> = 2822 | 5.7 (4 to 8)                        | 5 (2 to 8)         | 6 (1 to 11)         | 5 (0.3 to 9.7)      | 6 (1 to 11)         |
| PM <sub>10†</sub> , µg/m <sup>3</sup><br><i>n</i> = 2440  | 21 (15 to 30)                       | 21 (8 to 34)       | 21 (5 to 37)        | 21 (6 to 36)        | 22 (3 to 41)        |
| Temperature, °C<br><i>n</i> = 2832                        | 6.1 (-1.1 to 12.8)                  | 5.1 (-4.4 to 14.6) | 15.7 (10.1 to 21.3) | 5.8 (-3.9 to 15.5)  | -3.8 (-15.3 to 7.7) |
| Relative humidity, %<br><i>n</i> = 2832                   | 61.2 (49.9 to 73)                   | 56.9 (28 to 85.8)  | 62.9 (43.5 to 82.3) | 60.3 (37.1 to 83.5) | 63.1 (41.1 to 85.1) |

Note: IQR = interquartile range, PM<sub>2.5</sub> = particulate matter < 2.5 µ in diameter, PM<sub>10</sub> = particulate matter < 10 µ in diameter, ppb = parts per billion, ppm = parts per million.

\*Seasons are defined as spring (March–May), summer (June–August), autumn (September–November), and winter (December–February).

†The daily maximum was determined for ozone; daily means were determined for the other pollutants.
