# Supplementary material
Source: PubMed Central journal article supplement (PMC2764754)
Supplement: 082068v2_2.pdf [file 082068v2_2.pdf]

**Appendix 2:** Pearson correlation coefficients between daily concentrations of air pollutants, temperature and relative humidity in Calgary between 1999 and 2006

| Variable*         | Sulfur dioxide | Nitrogen dioxide | Carbon monoxide | Ozone  | PM <sub>2.5</sub> | PM <sub>10</sub> | Temperature | Relative humidity |
|-------------------|----------------|------------------|-----------------|--------|-------------------|------------------|-------------|-------------------|
| Sulfur dioxide    | 1              | 0.539            | 0.604           | -0.253 | 0.256             | 0.250            | -0.221      | -0.077            |
| Nitrogen dioxide  | -              | 1                | 0.816           | -0.412 | 0.332             | 0.423            | -0.520      | -0.025†           |
| Carbon monoxide   | -              | -                | 1               | -0.409 | 0.343             | 0.418            | -0.318      | 0.003†            |
| Ozone             | -              | -                | -               | 1      | 0.021†            | 0.091            | 0.575       | -0.485            |
| PM <sub>2.5</sub> | -              | -                | -               | -      | 1                 | 0.645            | 0.031†      | 0.056             |
| PM <sub>10</sub>  | -              | -                | -               | -      | -                 | 1                | 0.174       | -0.250            |
| Temperature       | -              | -                | -               | -      | -                 | -                | 1           | -0.381            |
| Relative humidity | -              | -                | -               | -      | -                 | -                | -           | 1                 |

Note: PM<sub>2.5</sub> = particulate matter < 2.5 µ in diameter, PM<sub>10</sub> = particulate matter < 10 µ in diameter.

\*The daily maximum was determined for ozone; daily means were determined for the other pollutants.

†p value = not significant.
