# Supplementary material
Source: PubMed Central journal article supplement (PMC2764754)
Supplement: 082068v2_3.pdf [file 082068v2_3.pdf]

**Appendix 3:** Association between appendicitis and increases in the interquartile range of air pollutants, stratified by age and sex

| Pollutant*        | Period        | Age, yr; OR (95% CI)†   |                         |                  | Sex; OR (95% CI)† |                    |
|-------------------|---------------|-------------------------|-------------------------|------------------|-------------------|--------------------|
|                   |               | 18–34 years<br>n = 2402 | 35–64 years<br>n = 2399 | > 64<br>n = 390  | Male<br>n = 2764  | Female<br>n = 2427 |
|                   |               | Ozone                   | Same day                | 1.03 (0.93–1.16) | 1.06 (0.95–1.18)  | 1.13 (0.87–1.48)   |
|                   | 1-day lag     | 1.08 (0.99–1.19)        | 1.04 (0.94–1.14)        | 1.05 (0.83–1.33) | 1.07 (0.98–1.17)  | 1.05 (0.95–1.15)   |
|                   | 3-day average | 1.10 (0.97–1.25)        | 1.11 (0.98–1.27)        | 1.02 (0.75–1.40) | 1.11 (0.98–1.25)  | 1.09 (0.96–1.24)   |
|                   | 5-day average | 1.10 (0.95–1.27)        | 1.21 (1.05–1.39)        | 1.02 (0.72–1.43) | 1.19 (1.04–1.36)  | 1.09 (0.94–1.25)   |
|                   | 7-day average | 1.16 (0.99–1.35)        | 1.17 (1.01–1.37)        | 1.03 (0.71–1.50) | 1.22 (1.06–1.41)  | 1.08 (0.93–1.26)   |
| Sulfur dioxide    | Same day      | 1.05 (0.97–1.14)        | 1.05 (0.97–1.15)        | 1.00 (0.82–1.21) | 1.07 (0.99–1.16)  | 1.02 (0.94–1.11)   |
|                   | 1-day lag     | 0.96 (0.88–1.04)        | 1.03 (0.95–1.13)        | 1.05 (0.86–1.27) | 1.00 (0.92–1.08)  | 1.00 (0.92–1.09)   |
|                   | 3-day average | 1.03 (0.92–1.16)        | 1.10 (0.98–1.23)        | 1.03 (0.79–1.34) | 1.09 (0.98–1.21)  | 1.03 (0.92–1.16)   |
|                   | 5-day average | 1.07 (0.93–1.22)        | 1.14 (1.00–1.30)        | 1.08 (0.79–1.49) | 1.15 (1.01–1.30)  | 1.05 (0.92–1.20)   |
|                   | 7-day average | 1.10 (0.95–1.28)        | 1.15 (0.99–1.34)        | 1.19 (0.83–1.69) | 1.14 (0.99–1.32)  | 1.11 (0.96–1.29)   |
| Nitrogen dioxide  | Same day      | 1.06 (0.97–1.17)        | 0.97 (0.88–1.07)        | 1.09 (0.85–1.40) | 1.01 (0.92–1.11)  | 1.03 (0.94–1.14)   |
|                   | 1-day lag     | 0.97 (0.87–1.07)        | 0.98 (0.89–1.08)        | 1.05 (0.82–1.33) | 0.97 (0.89–1.07)  | 0.99 (0.89–1.09)   |
|                   | 3-day average | 1.02 (0.89–1.16)        | 1.04 (0.91–1.19)        | 1.16 (0.83–1.62) | 1.02 (0.90–1.16)  | 1.06 (0.92–1.21)   |
|                   | 5-day average | 1.06 (0.91–1.24)        | 1.16 (0.99–1.36)        | 1.17 (0.79–1.75) | 1.09 (0.94–1.27)  | 1.13 (0.97–1.33)   |
|                   | 7-day average | 1.10 (0.92–1.31)        | 1.10 (0.92–1.32)        | 1.32 (0.84–2.06) | 1.08 (0.91–1.28)  | 1.15 (0.97–1.38)   |
| Carbon monoxide   | Same day      | 1.03 (0.98–1.08)        | 0.97 (0.92–1.02)        | 1.07 (0.94–1.21) | 1.00 (0.96–1.05)  | 1.00 (0.95–1.06)   |
|                   | 1-day lag     | 0.99 (0.94–1.04)        | 1.00 (0.95–1.05)        | 0.96 (0.84–1.10) | 1.00 (0.96–1.05)  | 0.98 (0.93–1.03)   |
|                   | 3-day average | 1.02 (0.94–1.10)        | 1.01 (0.93–1.08)        | 1.05 (0.87–1.27) | 1.03 (0.96–1.10)  | 1.00 (0.92–1.08)   |
|                   | 5-day average | 1.07 (0.98–1.16)        | 1.07 (0.98–1.17)        | 1.03 (0.82–1.29) | 1.08 (1.00–1.17)  | 1.04 (0.96–1.14)   |
|                   | 7-day average | 1.08 (0.97–1.19)        | 1.04 (0.94–1.15)        | 1.03 (0.81–1.33) | 1.07 (0.97–1.17)  | 1.04 (0.94–1.15)   |
| PM <sub>2.5</sub> | Same day      | 1.02 (0.98–1.06)        | 1.00 (0.96–1.05)        | 1.03 (0.92–1.15) | 1.01 (0.97–1.05)  | 1.02 (0.98–1.06)   |
|                   | 1-day lag     | 1.01 (0.97–1.06)        | 1.01 (0.97–1.06)        | 0.96 (0.86–1.07) | 0.99 (0.95–1.03)  | 1.02 (0.98–1.07)   |
|                   | 3-day average | 1.04 (0.99–1.09)        | 1.01 (0.96–1.07)        | 0.99 (0.87–1.13) | 1.01 (0.96–1.06)  | 1.04 (0.98–1.09)   |
|                   | 5-day average | 1.07 (1.01–1.14)        | 1.02 (0.96–1.08)        | 1.00 (0.87–1.15) | 1.04 (0.98–1.09)  | 1.05 (0.99–1.11)   |
|                   | 7-day average | 1.08 (1.01–1.16)        | 1.01 (0.94–1.08)        | 1.01 (0.86–1.18) | 1.04 (0.97–1.10)  | 1.05 (0.98–1.12)   |

Note: CI = confidence interval, OR = odds ratio, PM<sub>2.5</sub> = particulate matter < 2.5 μ in diameter.

\*The daily maximum was determined for ozone; daily means were determined for the other pollutants.

†Values are adjusted for temperature and relative humidity.
